# Supplementary material
Source: PubMed Central journal article supplement (PMC3182712)
Supplement: 1100012108_pnas.1100012108_SI.pdf [file 1100012108_pnas.1100012108_SI.pdf]

# Supporting Information

Zhao et al. 10.1073/pnas.1100012108

## SI Materials and Methods

**Materials and Cell Culture.** The expression vectors for GST-14-3-3 and HexaHis-14-3-3 isoforms and mutants were constructed as previously described (1). Glutathione agarose beads and nickel-charged affinity columns were purchased from GE Healthcare. Anti-Raf-1 and anti-GST antibodies were purchased from Santa Cruz and the anti-PRAS40 antibody was a product of Biosource. The LOPAC library was purchased from Sigma-Aldrich. COS-7 cells were grown in DMEM supplemented with 10% FBS.

**Florescence Polarization Assay and Chemical Screening.** The 14-3-3 FP assay was carried out in black 384-well microplates in a total volume of 50  $\mu$ L per well. Assay reaction buffer (1  $\mu$ M GST-14-3-3 $\gamma$  and 2 nM TMR-pS259-Raf-1 peptide in Hepes buffer; 49  $\mu$ L) were dispensed into each well. Test compound (1  $\mu$ L of 2 mM stock in DMSO) was added to the reaction buffer using a Sciclone liquid handler (Caliper LifeSciences) 384-channel low volume heads for a final compound concentration of 40  $\mu$ M in 2% DMSO. For each assay plate, column 1, 2, 23, and 24 contain controls. The following controls were included for each plate: TMRpS259-Raf-1 peptide alone (blank) and TMR-pS259-Raf-1 peptide with GST-14-3-3 $\gamma$  (negative control). The R18 peptide was added to wells with TMR-pS259-Raf-1 peptide and GST-14-3-3 $\gamma$  and served as a positive control. Plates were incubated at room temperature for 2 h and the FP value [in millipolarization (mP) units] was measured with an Analyst HT reader (Molecular Devices). An excitation filter at 545 nm and an emission filter at 610 to 675 nm were used with a dichroic mirror at 565 nm. Data analysis was conducted using CambridgeSoft software. Compounds with recorded mP values less than three standard deviation (SD) from the negative controls were considered positive hits.

**Enzyme-Linked Immunosorbent Assay.** The 14-3-3 ELISA assay was developed in 96-well microplates coated with anti-GST antibody (Pierce Biotechnology). Briefly, 50  $\mu$ L of GST-14-3-3 protein (1  $\mu$ M) was added to each well of an anti-GST plate and incubated at 4 °C overnight. The plate was washed three times with washing buffer (PBS with 0.05% Tween-20). One microliter of compound was then added to 49  $\mu$ L of washing buffer and incubated for 2 h before the addition of COS-7 lysate prepared in 1% NP-40 lysis buffer (2). After incubation with COS-7 lysate for 2 h, the plate was washed three times and then incubated with antibodies specific to the 14-3-3 client protein, PRAS40, and peroxidase-labeled antirabbit IgG (50  $\mu$ L; 1:1,000 dilution) for 1 h at room temperature. Plates were then washed four times and 100  $\mu$ L of tetramethylbenzidine was added. The reaction was stopped after 10 min with the addition of 100  $\mu$ L of 0.1 N sulfuric acid. Reactions were read at 450 nm on an Envision™ multilabel plate reader (Perkin Elmer). Results were normalized to the vehicle (DMSO) control wells after subtracting the background signal from the wells without GST-14-3-3. IC<sub>50</sub> values were calculated using GraphPad software. For experiments shown in Fig. S5, an ELISA assay protocol with the following modifications was used to monitor the 14-3-3 $\zeta$ /Raf-1 interaction. In this case, 96-well microplates coated with glutathione (Pierce Biotechnology) were used to capture GST-tagged 14-3-3 $\zeta$  protein. After incubation with cell lysates and extensive washing, anti-Raf-1 antibody was used to detect the presence of Raf-1 in the immobilized GST-14-3-3 protein complex.

**GST Pull-Down Assay and Western Blotting.** COS-7 cells were lysed in NP-40 buffer (1% NP-40, 10 mM Hepes, pH 7.4, 150 mM

NaCl, 5 mM NaF, 2 mM Na<sub>3</sub>VO<sub>4</sub>, 5 mM Na<sub>4</sub>P<sub>2</sub>O<sub>7</sub>, 10  $\mu$ g/mL aprotinin, 10  $\mu$ g/mL leupeptin, and 1 mM phenylmethylsulfonyl fluoride). The cell lysates were clarified and used as a source of 14-3-3 client proteins. GST-14-3-3 proteins were purified by glutathione-agarose affinity chromatography according to the manufacturer's instructions. For binding assays, GST-14-3-3 proteins (1  $\mu$ g) were preincubated with various concentrations of test compounds at room temperature for 10 min. COS-7 cell lysates were added to the 14-3-3/compound complex in a final volume of 20  $\mu$ L and incubated at 4 °C for 1 h. Glutathione Sepharose, 30  $\mu$ L, was added to the lysates and incubated at 4 °C for 2 h with rotation. Unbound proteins were removed from the beads by three washes with 1% NP-40 buffer. The fraction that was bound to the beads was analyzed by SDS-PAGE followed by immunoblotting with antibodies specific to Raf-1, PRAS40, and GST antibodies.

**ExoS Activation Assay.** To examine the functional effect of F1 on 14-3-3 proteins, we utilized a 14-3-3-dependent ExoS ADP-ribosyltransferase assay (3). ExoS, secreted from *Pseudomonas aeruginosa*, catalyzes the transfer of ADP-ribose from NAD to various cellular substrates. ExoS enzymatic activity requires 14-3-3 proteins for activation, which has been used for monitoring 14-3-3 function. 14-3-3 proteins are capable of initiating ExoS activity resulting in the transfer of the [<sup>32</sup>P]ADP-ribose moiety of NAD onto a substrate, soybean trypsin inhibitor (SBTI). This assay is used as a functional readout for 14-3-3 inhibitor screening. Briefly, 6xHis-14-3-3 protein (1  $\mu$ g/mL) was preincubated with the indicated concentrations of F1 for 30 min, followed by incubation with ExoS (1  $\mu$ g/mL) in 10 mM Hepes, pH 7.3, 130 mM NaCl, 100  $\mu$ g/mL SBTI, 5  $\mu$ M NAD, 0.35  $\mu$ Ci of [adenylate-<sup>32</sup>P]NAD<sup>+</sup>, and 0.1% bovine serum albumin in a final volume of 20  $\mu$ L at 25 °C for 10 min. The reaction was terminated by spotting 10  $\mu$ L of assay mixture onto P81 phosphocellulose paper (Whatman, Maidstone, United Kingdom). The filters were washed three times with 0.75% phosphoric acid and once with acetone. Radioactivity was determined by liquid scintillation counting. Enzyme activities were expressed as picomoles of ADP-ribose incorporated per min per microgram of ExoS. The inhibitory effect of F1 was expressed as percent inhibition of ExoS activity over vehicle control.

**Isothermal Titration Calorimetry (ITC) Analysis.** All ITC experiments were carried out with an auto-iTC200 instrument (MicroCal, GE). Test protein (400  $\mu$ L of 150  $\mu$ M stock solution), compound (120  $\mu$ L of 8 mM stock solution), and buffer (400  $\mu$ L of 10 mM Hepes, pH 7.4, and 100 mM NaCl) were placed in a loading 96 DeepWell PP plate (Nunc, Thermo Fisher Scientific). The test protein solution (200  $\mu$ L) was automatically transferred by the auto-iTC 200 instrument into the sample cell. Compound solution (2  $\mu$ L) was titrated stepwise into the protein sample cell using a syringe for a total of 20 injections except that the first injection was 0.4  $\mu$ L. The equilibrium time between two adjacent injections was 210 s. The binding stoichiometry ( $n$ ), binding constant ( $K_d$ ), and thermodynamic parameters ( $\Delta H$  and  $\Delta S$ ) were determined by fitting the titration curve to a one-site binding mode using the Origin software provided by the manufacturer.

**Protein Purification.** Bovine 14-3-3 $\zeta$  was expressed in *E. coli* BL21 (DE3) harboring pET-15b-derived plasmids and purified using Ni<sup>2+</sup> chelating chromatography essentially as described (3). Hexahistidine tags were removed by thrombin digestion (1 unit/mg of protein). The 14-3-3 protein used for crystallization was further



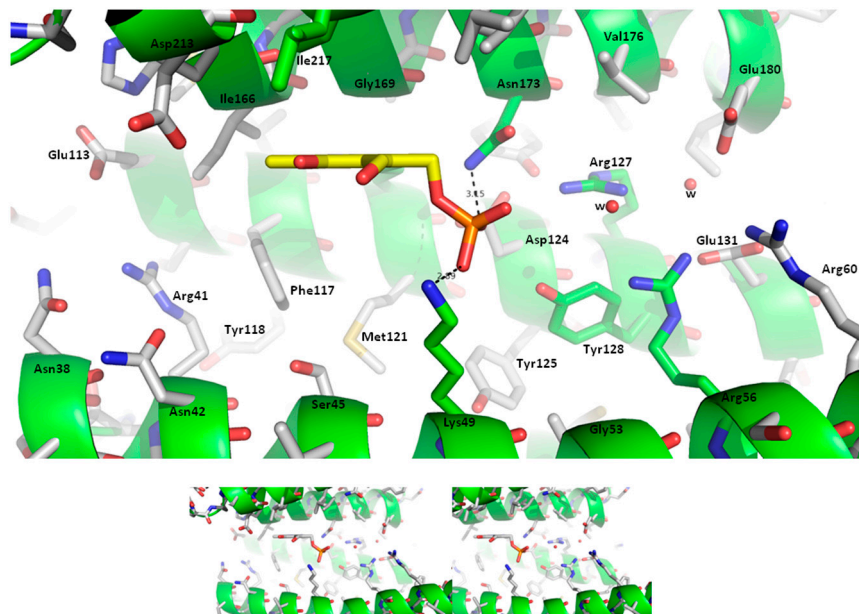

Fig. S3. Structural details of 14-3-3 $\zeta$  and F1 fragment interactions with labeled residues (upper box) and in stereo images (lower box).



**Fig. S4.** Thermodynamic measurements of the binding of FOBISIN 101 to wild-type 14-3-3 $\zeta$  (A) and five mutants (B. K120E, C. K49E, D. V176D, E. R56E, F. R60E) from isothermal titration calorimetry. Residues that were mutated are centered around the binding site for the phosphate group of its peptide ligands and the proposed site for uncleaved FOBISIN 101 (Fig. 2). For each protein sample, the upper box is the raw heating power over time and the lower box is a fit of the integrated energy values normalized for each injection. The ITC experiments were performed at least four times. Thermodynamic values obtained are listed in Table S2.

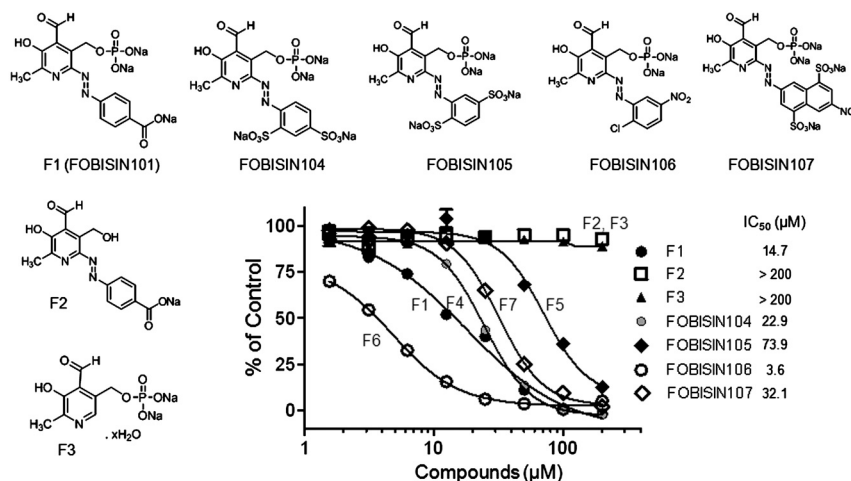

**Fig. S5.** Inhibition of the interaction between 14-3-3 $\zeta$  and Raf-1 by F1 and its analogues in an ELISA assay. Interaction of Raf-1 with GST-14-3-3 $\zeta$  immobilized on a glutathione-coated plate gave rise to robust ELISA signals as detected by anti-Raf-1 antibody. The data are normalized to the vehicle (DMSO) control wells after subtracting the background signal from the wells without GST-14-3-3 $\zeta$  protein.  $IC_{50}$ s were estimated using GraphPad software. Tested compounds include FOBISIN 104 (pyridoxal phosphate-6-azophenyl-2',4'-disulfonic acid tetrasodium salt), 105 (pyridoxal phosphate-6-azophenyl-2',5'-disulfonic acid tetrasodium salt), 106 (2-[(2-Chloro-5-nitrophenyl)azo]-5-hydroxy-6-methyl-[(phosphonoxy)methyl]-4-pyridinecarboxaldehyde disodium salt), and 107 (pyridoxal phosphate-6-(2'-naphthylazo-6'-nitro-4',8'-disulfonate) tetrasodium salt).

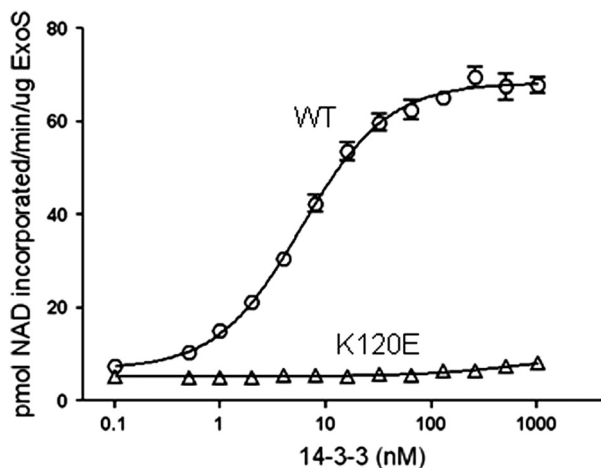

**Fig. S6.** Activation of ExoS ADP-ribosyltransferase activity by 14-3-3 $\zeta$  in comparison to 14-3-3 $\zeta$ /K120E. ExoS was incubated with  $^{32}$ P-NAD and STBI as substrates. While addition of wild-type 14-3-3 $\zeta$  resulted in an increase in ExoS activity, as measured by pmol ADP-ribose incorporated into STBI per min, addition of the charge-reversal mutant, K120E, failed to activate ExoS.

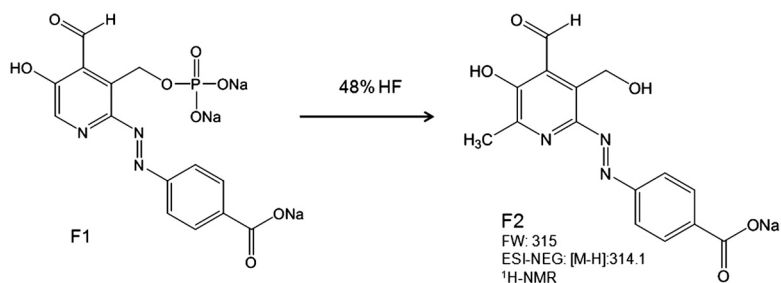

**Fig. S7.** Chemical synthesis of compound F2 from F1.

**Table S1. Data collection and refinement statistics (molecular replacement)**

|                                   |                                                        |
|-----------------------------------|--------------------------------------------------------|
| Data collection                   | 14-3-3 $\zeta$ (FOBISIN 101)                           |
| Space group                       | $P6_5$                                                 |
| Cell dimensions                   | ( $\alpha = \beta = 90^\circ$ ; $\gamma = 120^\circ$ ) |
| a, b, c (Å)                       | 94.75, 94.75, 237.86                                   |
| Beamline (SERCAT)                 | APS 22-ID                                              |
| Wavelength (Å)                    | 0.97926                                                |
| Resolution (Å)                    | 33.77-2.39 (2.48-2.39)*                                |
| $R_{\text{merge}}$                | 0.114 (0.722)                                          |
| $I/\sigma I$                      | 12.5 (1.8)                                             |
| Completeness (%)                  | 99.2 (100.0)                                           |
| Redundancy                        | 5.0 (4.0)                                              |
| Observed reflections              | 240,793                                                |
| Unique reflections                | 47,706 (4,785)                                         |
| Refinement                        |                                                        |
| Resolution (Å)                    | 2.39                                                   |
| No. Reflections                   | 44,678                                                 |
| $R_{\text{work}}/R_{\text{free}}$ | 0.235/0.286                                            |
| No. atoms                         |                                                        |
| Protein                           | 7,284                                                  |
| FOBISIN 101                       | 108                                                    |
| Water                             | 86                                                     |
| B-factor (Å <sup>2</sup> )        |                                                        |
| Protein (A/B/C/D)                 | 54.3/60.9/58.5/62.6                                    |
| FOBISIN 101 (A/B/C/D)             | 57.4/62.2/63.3/66.1                                    |
| Water                             | 48.7                                                   |
| rms deviations                    |                                                        |
| Bond lengths (Å)                  | 0.007                                                  |
| Bond angles (°)                   | 1.1                                                    |

\*Values in parentheses are for highest-resolution shell.

**Table S2. Thermodynamic constants obtained by ITC for the binding of FOBISIN 101 to wild-type 14-3-3 $\zeta$  protein and the mutants**

|       | $K_d$ ( $\mu\text{M}$ ) | $\Delta H$ (kcal/mol) | $-T\Delta S$ (kcal/mol) |
|-------|-------------------------|-----------------------|-------------------------|
| WT    | 75.8                    | -5.2                  | -0.5                    |
| K120E | 97.1                    | -7.5                  | 2.0                     |
| K49E  | 109.5                   | -8.4                  | 3.0                     |
| V176D | 132.5                   | -8.9                  | 3.6                     |
| R56E  | 140.9                   | -10.2                 | 5.0                     |
| R60E  | 142.9                   | -9.1                  | 3.9                     |

Decreased binding affinity of FOBISIN 101 to each mutated protein was observed, with R56E and R60E exhibiting the most significant effects. This decrease is likely due to the unfavorable entropy change, as  $-T\Delta S$  increases from -0.5 to 5.0 Kcal/mol. Overall, it appears that the binding affinity of the protein to FOBISIN 101 is only slightly affected by mutating a single residue at the binding site, which contains a cluster of positively charged residues.
